# Supplementary material for: Concurrent Gene Insertion, Deletion, and Inversion during the Construction of a Novel Attenuated BoHV-1 Using CRISPR/Cas9 Genome Editing
Source: MDPI journal article supplement (doi:10.3390/vetsci9040166), 2022-03-30
Supplement: s1 [file s1]

**Supplementary Figure S1.** Cloning and purification of BoHV-1 gE/EGFP<sup>+</sup>.

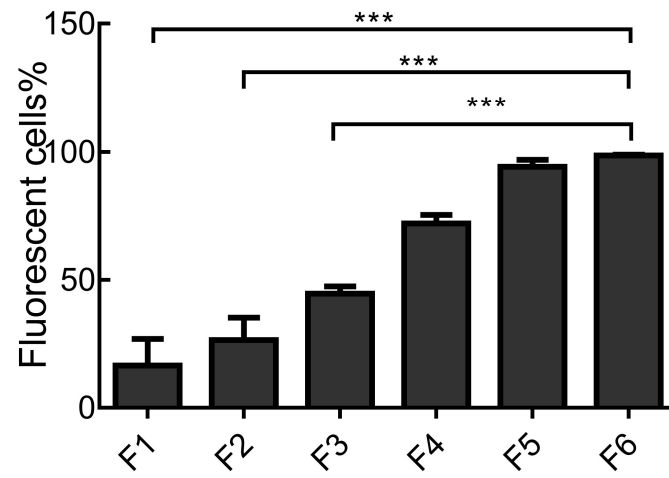

**Figure S1.** Purify 6 passages (F1–F6) by plaque cloning, and the percentage of fluorescent cells to total cells in each passage was calculated using Image J software. \*\*\*  $p < 0.001$ .
